# Supplementary material for: Formation of well-ordered finger-like structures on pre-cast thin films
Source: Royal Society of Chemistry journal article supplement (doi:10.1039/c4ra06467d), 2014-01-01
Supplement: c4ra06467d1.pdf [file c4ra06467d1.pdf]

Supporting information

## Formation of well-ordered finger-like structures on pre-cast thin films

*Wei Sun and Fuqian Yang\**

Materials Program, Department of Chemical and Materials Engineering

University of Kentucky, Lexington, KY 40506, United States.

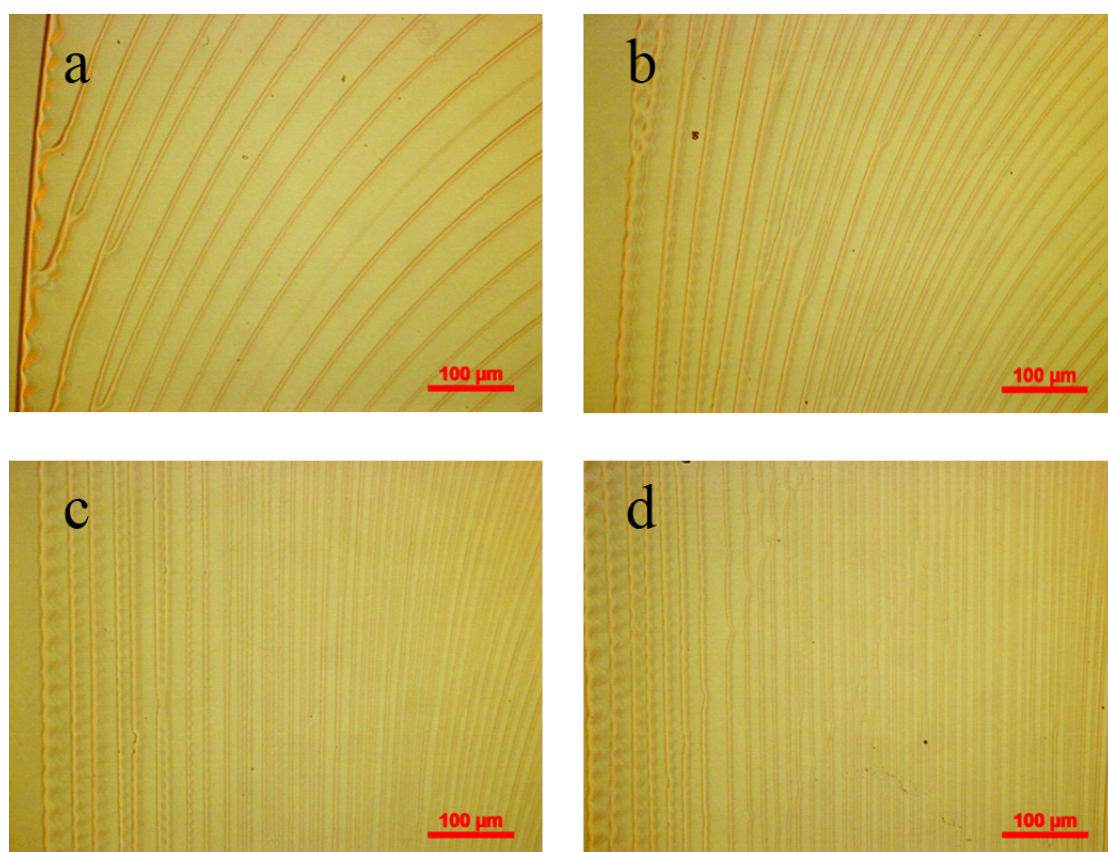

**Figure S1.** Optical images of the surface patterns formed near the outmost edge of a single finger for different normalized distances: (a) 0.125, (b) 0.25, (c) 0.5, and (d) 0.625 (droplet volume: 5  $\mu\text{L}$ , tilt angle: 2.86°)

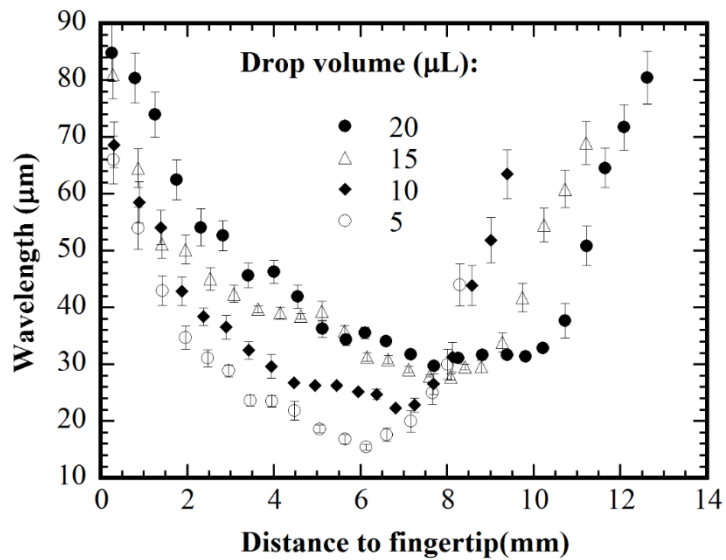

**Figure S2.** Variation of the wavelength with the distance to the fingertip along the symmetric axis for different droplet volumes (tilt angle:  $2.86^\circ$ )

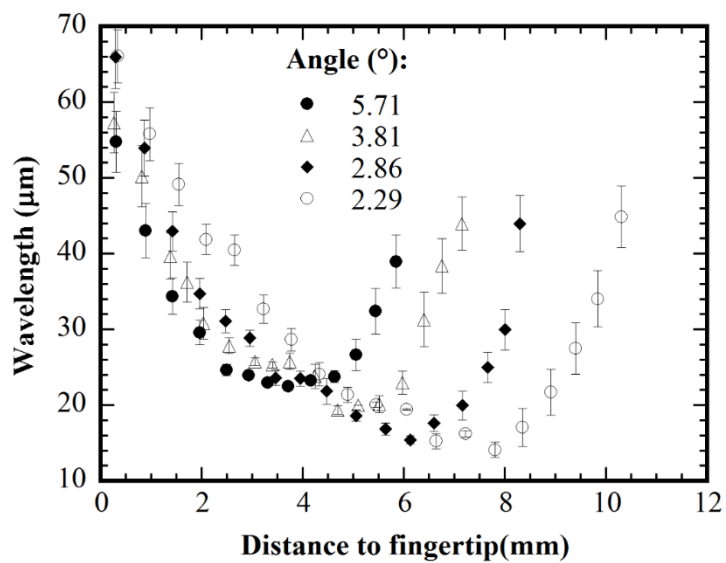

**Figure S3.** Variation of the wavelength with the distance to the fingertip along the symmetric axis for different tilt angles (droplet volume:  $5 \mu\text{L}$ )

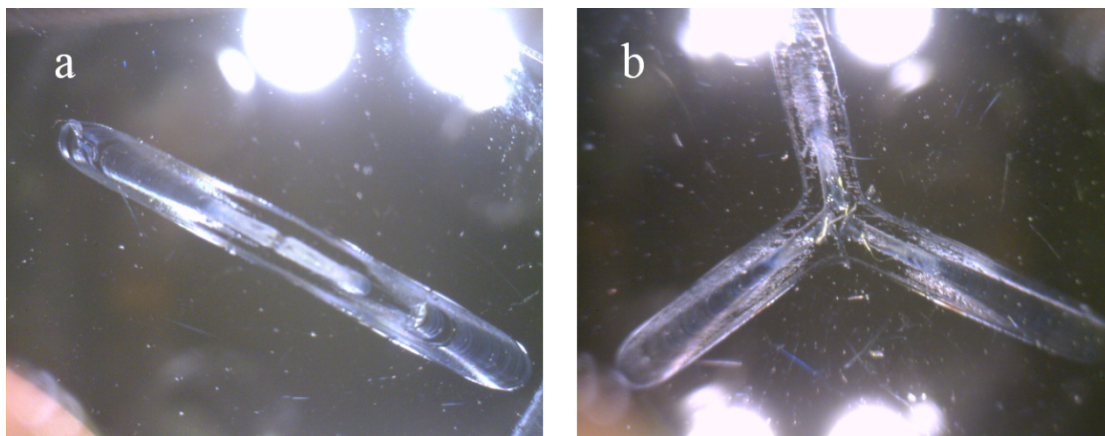

**Figure S4.** Surface patterns composed of (a) two fingers, and (b) three fingers (droplet volume: 10 $\mu$ L, tilt angle: 2.86 $^\circ$ )
